# Supplementary material
Source: publisher site journal article supplement (https://www.spandidos-publications.com/4488/downloadSupplementary)
Supplement: Supplementary file 1 [file downloadSupplementary]

## Sheet: KRIEG
KRIEG_HYPOXIA_NOT_VIA_KDM3A
> Genes induced under hypoxia independently of KDM3A [GeneID=55818] in RCC4 cells (renal carcinoma) expressing VHL [GeneID=7428].
ABCB6
ABTB2
ACAT2
ACTG1
ACTG1P10
ADAM10
ADAMTS3
ADARB1
ADD3
ADPRS
AGPAT5
AIFM2
AK4
AKAP12
ALDH18A1
ALDOA
ALDOAP2
ALDOC
ALKBH5
AMPD2
ANG
ANGPTL4
ANKLE2
ANKRD10
ANKZF1
ANO6
ANTXR1
ANXA3
AP1S2
APOL1
APOL2
ARFIP2
ARHGAP27
ARHGEF7
ARID3B
ARID5A
ARL4C
ARNTL
ARRDC3
ASAP1
ASAP2
ASF1B
ASXL1
ATAD2
ATG9A
ATP1B1
ATRX
AVPI1
AXIN1
AZIN2
B4GALNT4
BACE2
BACH1
BCKDK
BCL2L1
BFAR
BFSP1
BHLHE40
BID
BIRC5
BMT2
BNIP3
BNIP3L
BOK
BPNT2
BTBD6
BTN2A2
BUB1
BZW1
C11orf68
C11orf95
C1QL1
C2orf15
CA9
CABLES1
CACHD1
CADM1
CALM1
CAMK1D
CAPN12
CAPN5
CARD10
CARS2
CASK
CAST
CAVIN1
CCDC102A
CCDC107
CCDC80
CCDC85C
CCDC9B
CCN2
CCN3
CCND1
CCNG1
CCNG2
CCNY
CCR1
CD44
CDC42EP1
CDCA5
CDCP1
CDK18
CDK2AP1
CDS2
CDT1
CENPF
CENPQ
CENPU
CEP112
CEP250
CEP55
CEP95
CHN1
CHRAC1
CHST14
CHSY1
CIC
CITED4
CLK3
CNN3-DT
CNOT11
CP
CRAMP1
CRKL
CRTC2
CRYBB2
CSPP1
CSRP2
CTDSP1
CTDSPL2
CTHRC1
CTNNAL1
CTNNB1
CUL4A
CXCL1
CXCL6
CYTH2
CYTH3
DAB2IP
DAPK1
DAPK3
DBNDD2
DCAF7
DDB2
DDIT4
DDX41
DEGS1
DENND4C
DERA
DHFR
DHRS13
DIAPH2
DIPK2A
DISC1
DNAJB6
DOC2A
DPCD
DPYSL2
DPYSL3
DRAM1
DSC2
DTL
DUSP1
DYRK2
E2F7
ECE2
ECT2
EEF1AKMT3
EFEMP2
EFNA3
EGFR
EGLN1
EHBP1L1
EHD2
EIF4EBP1
ELFN2
ELL2
ELP5
EMP3
ENO1
ENO2
ENOSF1
EPAS1
EPHA2
ERCC5
ERGIC1
ETS1
EVA1A
FADS2
FAM107B
FAM117B
FAM162A
FAM207A
FAM210A
FAM219A
FAM224A
FAM234B
FAM53B
FAM83H
FANCI
FAS
FAXC
FBRSL1
FBXL16
FBXL21P
FBXL3
FBXO17
FBXO32
FBXO42
FGF11
FGF12
FGFRL1
FHL1
FJX1
FLG-AS1
FLNA
FNBP1
FOXD1
FOXE1
FOXM1
FOXN3
FSCN1
FTSJ1
FUT11
FZD1
GAB2
GADD45A
GAL3ST1
GALNT18
GAPDH
GAPDHP23
GBE1
GCLC
GEMIN7
GGA2
GLIS2
GLTP
GMCL1
GNA13
GPER1
GPR161
GPRC5A
GPRC5B
GRK3
GRSF1
GSK3B
GSN
GYS1
H1-2
H2AC18
H2BC5
H3-3B
HILPDA
HIVEP2
HJURP
HK1
HK2
HNF1B
HNRNPDL
HOOK3
HS3ST3A1
HSD3B7
HSPA12A
ICAM1
IER3
IER5
IER5L
IFIT2
IFITM10
IFNAR1
IFNGR2
IFT74
IGFBP3
IKBIP
IL17RA
IL1RAP
IL6
IMP3
IMPDH1
ING1
ING2
INSIG1
INSIG2
IRAK1
IRS2
IRX3
ISG20
ITGA3
ITGB2
ITGB5
JAK1
JMJD6
JPT2
JUN
JUND
KAT2B
KBTBD11
KCMF1
KCNIP1
KCNIP3
KCNMA1
KCNMB1
KCTD11
KCTD15
KCTD3
KDM2A
KDM2B
KDM5B
KIAA0513
KIAA1671
KIAA1958
KIF11
KIF18B
KIFC1
KLF13
KLF6
KNTC1
KRBA1
KTN1
LACTB
LAT
LDHA
LDHC
LEMD1
LGALS1
LGALS3
LHFPL2
LHFPL6
LNPK
LONP1
LOX
LOXL2
LPCAT1
LRRC61
LSR
LUC7L
LURAP1L
MAFF
MAFK
MAP2K1
MAP3K21
MAP3K3
MAP3K4
MAP3K7CL
MAPK1
MAPK7
MAPK8IP3
MARCHF6
MARCHF9
MASTL
MBD2
MCM5
MEF2D
MELK
MEX3D
MFNG
MFSD12
MGAT5
MGLL
MICAL3
MIR155HG
MIR23AHG
MITF
MKLN1
MKRN1
MLLT3
MLYCD
MMP24
MNS1
MOB3A
MPI
MPP1
MRGBP
MRPL37
MRPS6
MSANTD3
MSMO1
MTCL1
MTFP1
MTHFD1L
MTMR1
MTUS1
MUC1
MXI1
MXRA7
MYADM
MYBL2
MYC
MYH10
MYH9
MYOF
N4BP2L2
NARF
NCAPG2
NCKIPSD
NDC1
NDRG1
NEDD4
NEFL
NEK6
NEURL3
NEXN
NFIA
NFIL3
NFKBIA
NHS
NIBAN2
NID1
NIPA1
NIPAL3
NOL3
NR1H4
NR3C1
NRSN2
NT5DC2
NTAN1
NUAK1
NUDT18
NUSAP1
OGFR
OIP5
OLFML2A
ORC1
OSBPL10
OSMR
OXSR1
P4HA1
P4HA2
PACS1
PADI1
PAGR1
PALM2AKAP2
PAM
PAN3
PANX2
PAQR4
PAX2
PAXIP1
PBOV1
PCGF5
PCIF1
PDCD10
PDGFC
PDIA3
PDK1
PDK2
PDLIM2
PDXP
PEA15
PEDS1
PERP
PEX3
PFKFB3
PFKP
PGAM1
PGK1
PGM1
PGM2
PGPEP1
PHC2
PHF13
PHF19
PHF21A
PIGH
PIH1D1
PKM
PKMYT1
PLAGL1
PLEKHA8
PLEKHO1
PLIN2
PLOD2
PLP2
PMEPA1
PMP22
PNMA2
PNRC1
POGLUT3
POLE
POLG
POLR2H
POU5F1
POU5F1B
PPFIA4
PPP1CC
PPP1R13L
PPP1R14B
PPP1R16A
PPP1R3B
PPP1R3C
PPP2R5B
PPP3CC
PPTC7
PRC1
PRELID2
PRKAA2
PRKAR1B
PRR11
PRR7
PSG7
PTP4A2
PTPN14
PTTG1IP
QKI
QSOX1
RAB11FIP5
RAB20
RAB3B
RAB42
RAB42P1
RAB6C
RAB9A
RABGEF1
RACGAP1
RAD51
RAP2A
RAPGEF1
RAPH1
RASA3
RASSF1
RASSF2
RASSF7
RAVER1
RBM15B
RBPJ
RCC2
REC8
RERG
RETREG1
RFC1
RGMB
RHOF
RIC1
RIC8A
RIMKLA
RIN2
RIPK4
RIT1
RN7SK
RNASET2
RNF126
RNF149
RNF169
RNF24
RNF4
RNU2-1
RRAGA
RRAS2
RRP1
RUNX1
RYBP
SAP30
SAV1
SCARA3
SCD
SDC1
SEC14L1
SEC61G
SELENOH
SEMA5A
SEMA5B
SEMA6A
SERPINE2
SERTAD2
SGF29
SGSM2
SH3GL1
SHANK2
SHFL
SIAH2
SIRPA
SLC10A3
SLC15A4
SLC16A1
SLC1A1
SLC22A5
SLC25A29
SLC25A36
SLC26A6
SLC29A4
SLC2A1
SLC31A2
SLC35E1
SLC35E3
SLC38A1
SLC38A2
SLC39A1
SLC39A13
SLC39A14
SLC39A8
SLC3A2
SLC43A3
SLC6A10P
SLC6A8
SLC7A5
SLCO4A1
SMAD7
SMOX
SMS
SMTN
SMURF2
SMYD2
SNHG12
SNHG5
SNHG7
SNTA1
SNX33
SOAT1
SOD2
SORBS3
SOWAHC
SOX12
SPAG1
SPAG4
SPATA2L
SPG7
SPHK1
SPIRE1
SPNS2
SPRED2
SPRY1
SRGAP2
SRSF3
STARD13
STARD4
STBD1
STC2
STK10
STK39
SUMO3
SUSD1
SWAP70
SYNC
SYT12
SYTL2
TAB2
TACC1
TACC3
TANC2
TBC1D8
TBC1D9B
TCF19
TCF3
TENT4A
TES
TESK1
TEX10
TGFA
TGFB1
TGIF2
THBD
THOC6
TICAM1
TIPARP
TK1
TLCD3A
TMEM102
TMEM120B
TMEM185A
TMEM41B
TMEM44
TMEM45A
TMSB10
TMSB15B
TMSB4XP1
TMX1
TNFAIP3
TNFAIP6
TNFAIP8
TNFRSF10D
TNIP1
TNNT1
TOB2
TP53BP2
TPD52
TPI1
TPI1P1
TPM1
TRAF3
TREX1
TRIB3
TRIO
TRIOBP
TRIP13
TRPC1
TSC22D2
TSHZ3
TSR1
TTYH3
TUBA4A
TUBA8
TUBB
TUBB3
TUBB4B
TUBB6
TUBB8P11
TUBBP1
TXNRD2
TYMS
UAP1
UBA6
UBALD2
UBE2J1
UBE2O
UHRF1
UIMC1
UPRT
USP1
USP31
USP36
VDAC1
VEGFB
VIM
VKORC1
VPS13D
VPS26C
WAC
WDR43
WDR45B
WDR54
WDR90
WSB1
WTAP
WWC2-AS2
YEATS2
ZC3H7A
ZFP82
ZFP91
ZHX2
ZMIZ2
ZMYM2
ZNF114
ZNF229
ZNF292
ZNF296
ZNF367
ZNF48
ZNF496
ZNF581
ZNF629
ZNF655
ZNRF1
ZP1
ZSWIM5
ZYX

## Sheet: WINTER
Table SII. Hypoxia-related genesets from GSEA database.
WINTER_HYPOXIA_METAGENE
> Genes regulated by hypoxia, based on literature searches.
ABCB1
ACAT1
ADM
ADORA2B
AK2
AK3
ALDH1A1
ALDH1A3
ALDOA
ALDOC
ANGPT2
ANGPTL4
ANXA1
ANXA2
ANXA5
ARHGAP5
ARSL
ART1
BACE2
BATF3
BCL2L1
BCL2L2
BHLHE40
BHLHE41
BIK
BIRC2
BNIP3
BNIP3L
BPI
BTG1
CA12
CA9
CALD1
CCNG2
CCT6A
CD99
CDK1
CDKN1A
CDKN1B
CITED2
CLK1
CNOT7
COL4A5
COL5A1
COL5A2
COL5A3
CP
CTSD
CXCL8
CXCR4
DDIT3
DDIT4
DELEC1
DKC1
DR1
EDN1
EDN2
EFNA1
EGF
EGR1
EIF4A3
ELF3
ELL2
ENG
ENO1
ENO3
ENPEP
EPO
ERRFI1
ETS1
F3
FABP5
FGF3
FKBP4
FLT1
FN1
FOS
FTL
GAPDH
GBE1
GLRX
GPI
HAP1
HBP1
HDAC1
HDAC9
HERC3
HERPUD1
HGF
HIF1A
HILPDA
HK1
HK2
HLA-DQB1
HMOX1
HMOX2
HSP90B1
HSPA5
HSPD1
HSPH1
HYOU1
ICAM1
ID2
IFI27
IGF2
IGFBP1
IGFBP2
IGFBP3
IGFBP5
IL6
INSIG1
IRF6
ITGA5
JUN
KDR
KRT14
KRT18
KRT19
LDHA
LDHB
LEP
LGALS1
LONP1
LOX
LRP1
MAP4
MET
MIF
MMP13
MMP2
MMP7
MPI
MT-CO1
MT-CO2
MT1L
MTL3P
MUC1
MXI1
NDRG1
NFIL3
NFKB1
NFKB2
NOS1
NOS2
NOS2P1
NOS2P2
NOS3
NR3C1
NR4A1
NSG1
NT5E
ODC1
P4HA1
P4HA2
PAICS
PDGFB
PDK3
PFKFB1
PFKFB3
PFKFB4
PFKL
PGAM1
PGF
PGK1
PGK2
PGM1
PIM1
PIM2
PKM
PLAU
PLAUR
PLIN2
PLOD2
PNN
PNP
POLM
PPARA
PPAT
PROK1
PSMA3
PSMD9
PTGS1
PTGS2
QSOX1
RBPJ
RELA
RIOK3
RNASEL
RPL36A
RRP9
SAT1
SERPINB2
SERPINE1
SGSM2
SIAH2
SIN3A
SIRPA
SLC16A1
SLC16A2
SLC20A1
SLC2A1
SLC2A3
SLC3A2
SLC6A10P
SLC6A16
SLC6A6
SLC6A8
SORL1
SPP1
SRSF6
STC2
SYT7
TBPL1
TCEAL1
TEK
TF
TFF3
TFRC
TGFA
TGFB1
TGFB3
TGFBI
TGM2
TH
THBS1
THBS2
TIMM17A
TNFAIP3
TP53
TPBG
TPD52
TPI1
TXN
TXNIP
UMPS
VEGFA
VEGFB
VEGFC
VIM
VPS11
VPS51
XRCC6
ZNRD2
